# Supplementary figures and images for: Punicalagin protects against impaired skeletal muscle function in high-fat-diet-induced obese mice by regulating TET2
Source: Royal Society of Chemistry journal article supplement (doi:10.1039/d2fo03926e), 2023-01-01

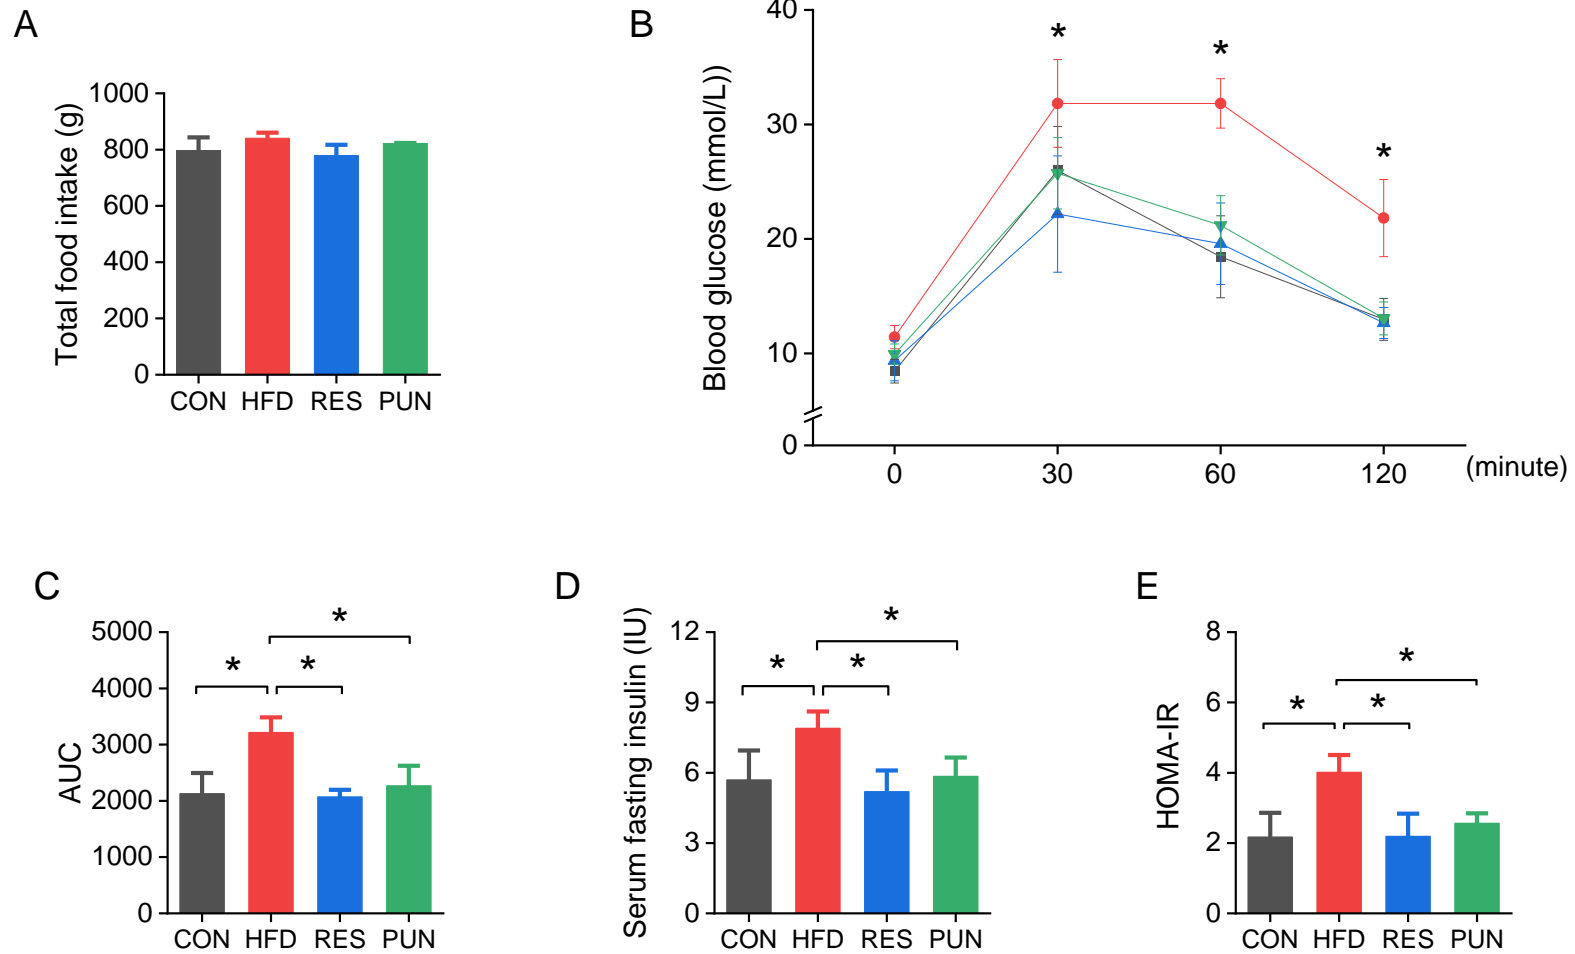

Figure S1

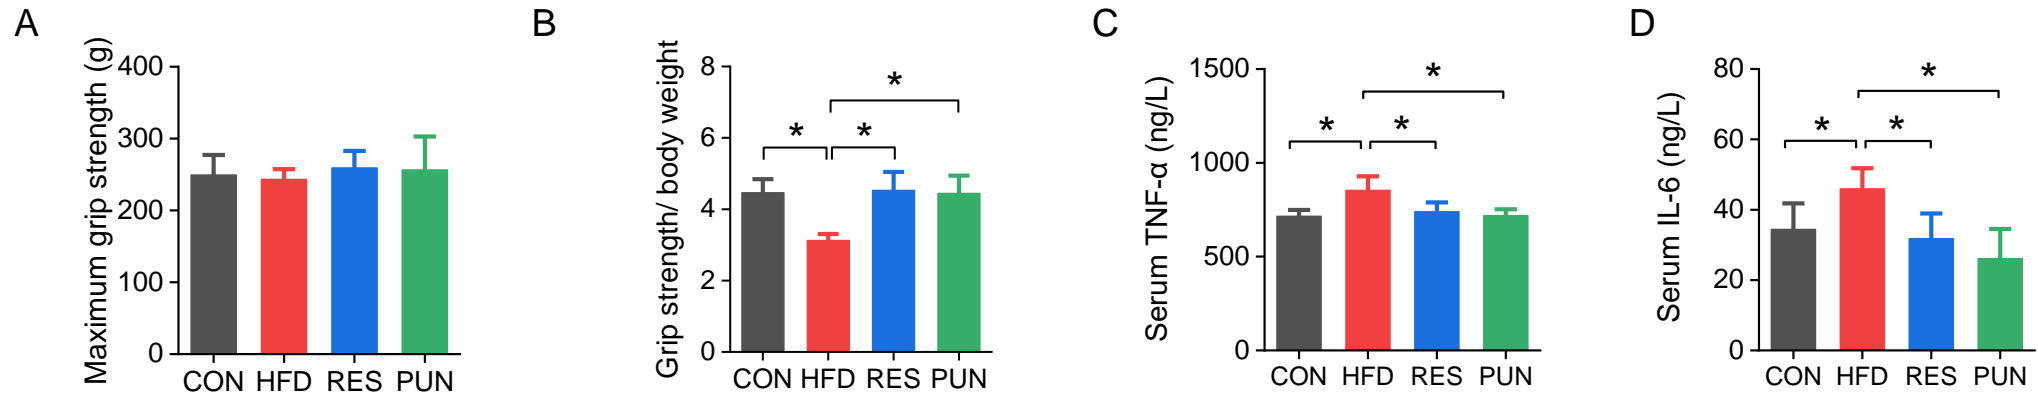

Figure S2

Supplement: d2fo03926e2.pdf [file d2fo03926e2.pdf]
